# Supplementary material for: Mineralization of autochthonous particulate organic carbon is a fast channel of organic matter turnover in Germany's largest drinking water reservoir
Source: Copernicus journal article supplement (doi:10.5194/bg-19-5343-2022), 2022-11-24
Supplement: Supplementary file 1 [file bg-19-5343-2022-supplement.zip]

Archive with 3 entries (3 files):
- S2_R2.xlsx
- S1_R2.docx
- bg-19-5343-2022-supplement-title-page.pdf
