# Supplementary material for: Mineralization of autochthonous particulate organic carbon is a fast channel of organic matter turnover in Germany's largest drinking water reservoir
Source: Copernicus journal article supplement (doi:10.5194/bg-19-5343-2022), 2022-11-24
Supplement: Supplementary file 1 [file bg-19-5343-2022-supplement.zip › bg-19-5343-2022-supplement-title-page.pdf]

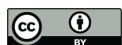

*Supplement of*

**Mineralization of autochthonous particulate organic carbon is a fast channel of organic matter turnover in Germany's largest drinking water reservoir**

**Marlene Dordoni et al.**

*Correspondence to:* Marlene Dordoni (mvdordoni@gmail.com)

- bg-19-5343-2022-supplement-title-page.pdf
- S1\_R2.docx
- S2\_R2.xlsx

The copyright of individual parts of the supplement might differ from the article licence.
