# Supplementary material for: Mineralization of autochthonous particulate organic carbon is a fast channel of organic matter turnover in Germany's largest drinking water reservoir
Source: Copernicus journal article supplement (doi:10.5194/bg-19-5343-2022), 2022-11-24
Supplement: Supplementary file 1 [file bg-19-5343-2022-supplement.zip › S1_R2.docx]

**SUPPLEMENTARY MATERIAL for**

**Mineralization of autochthonous particulate organic carbon is a fast channel of organic matter turnover in Germany’s largest drinking water reservoir**

Marlene Dordoni 1, Michael Seewald 2, Karsten Rinke 2, Robert van Geldern 1, Jakob Schmidmeier 1, Johannes A.C. Barth 1

1Friedrich- Alexander-Universität Erlangen-Nürnberg (FAU), Department of Geography and Geosciences, GeoZentrum Nordbayern, Schlossgarten 5, Erlangen, 91054, Germany

2 Helmholtz Centre for Environmental Research-UFZ, Brueckstrasse 3a, D-39114, Magdeburg, Germany

*Correspondence to:* Marlene Dordoni ([marlene.dordoni@fau.de](mailto:marlene.dordoni@fau.de))

# Supplementary information regarding Equation (2) in the main text

Mass balances based on isotope ratios are a useful tool in environmental studies to assess the isotope abundances in pools derived by the combination of isotopically differing materials (Hayes, 2004). In our manuscript, we determined the amount of dissolved inorganic carbon (DIC) theoretically as turned over from organic matter (OM). The OM could be autochthonous and allochthonous particulate organic carbon – auto-POC and allo-POC; dissolved organic carbon – DOC; sedimentary material – SED. Their individual isotope compositions were placed in the following mass balance:

This can be re-arranged as equation 2 in the main text:

In this equation:

OM = organic matter

DIC = dissolved inorganic carbon

δ13COM = C isotope composition of the different OM (autochthonous and allochthonous particulate organic carbon – auto-POC and allo-POC; dissolved organic carbon – DOC; sedimentary material – SED ). This equation is run separately with these different inputs of OM to find the best match between DIC concentration differences and isotope mass balances (cf Fig. 4 in the main text).

# Supplementary information regarding Equation (3) in the main text

Where:

S is the total standard deviation

∂nfromOM is the molar contribution from OM turnover

∂nt is the DIC concentration at time 0 (baseline)

∂δ13Ct is the isotope composition of DIC at time 0 (baseline)

∂δ13Cs is the isotope composition of DIC of a given sampling

∂δ13COM is the isotope composition of OM of a given sampling (input variable)

s in the standard deviation for the relative datum (Barth et al., 2017):

snt = 0.033 mmol

sδ13Ct = 0.21 ‰

sδ13Cs = 0.20 ‰

sδ13CDOC = 0.30 ‰

sδ13Cauto-POC = 0.70 ‰

sδ13CSED = 0.80 ‰

sδ13Callo-POC = 1.30 ‰

# References

Barth, J.A.C., Mader, M., Nenning, F., van Geldern, R. and Friese, K.: Stable isotopes mass balances versus concentration differences of dissolved inorganic carbon - implications for tracing carbon turnover in reservoirs. Isot. Environ. Health Stud., 53, [doi:10.1080/10256016.2017.1282478](https://doi.org/10.1080/10256016.2017.1282478), 2017.

Hayes, J. M.: An Introduction to Isotopic Calculations. Woods Hole Oceanographic Institution, available at: http://www.whoi.edu/cms/files/jhayes/2005/9/IsoCalcs30Sept04_5183.pdf (last access: 22 August 2022), 2004.

# Supplementary figures


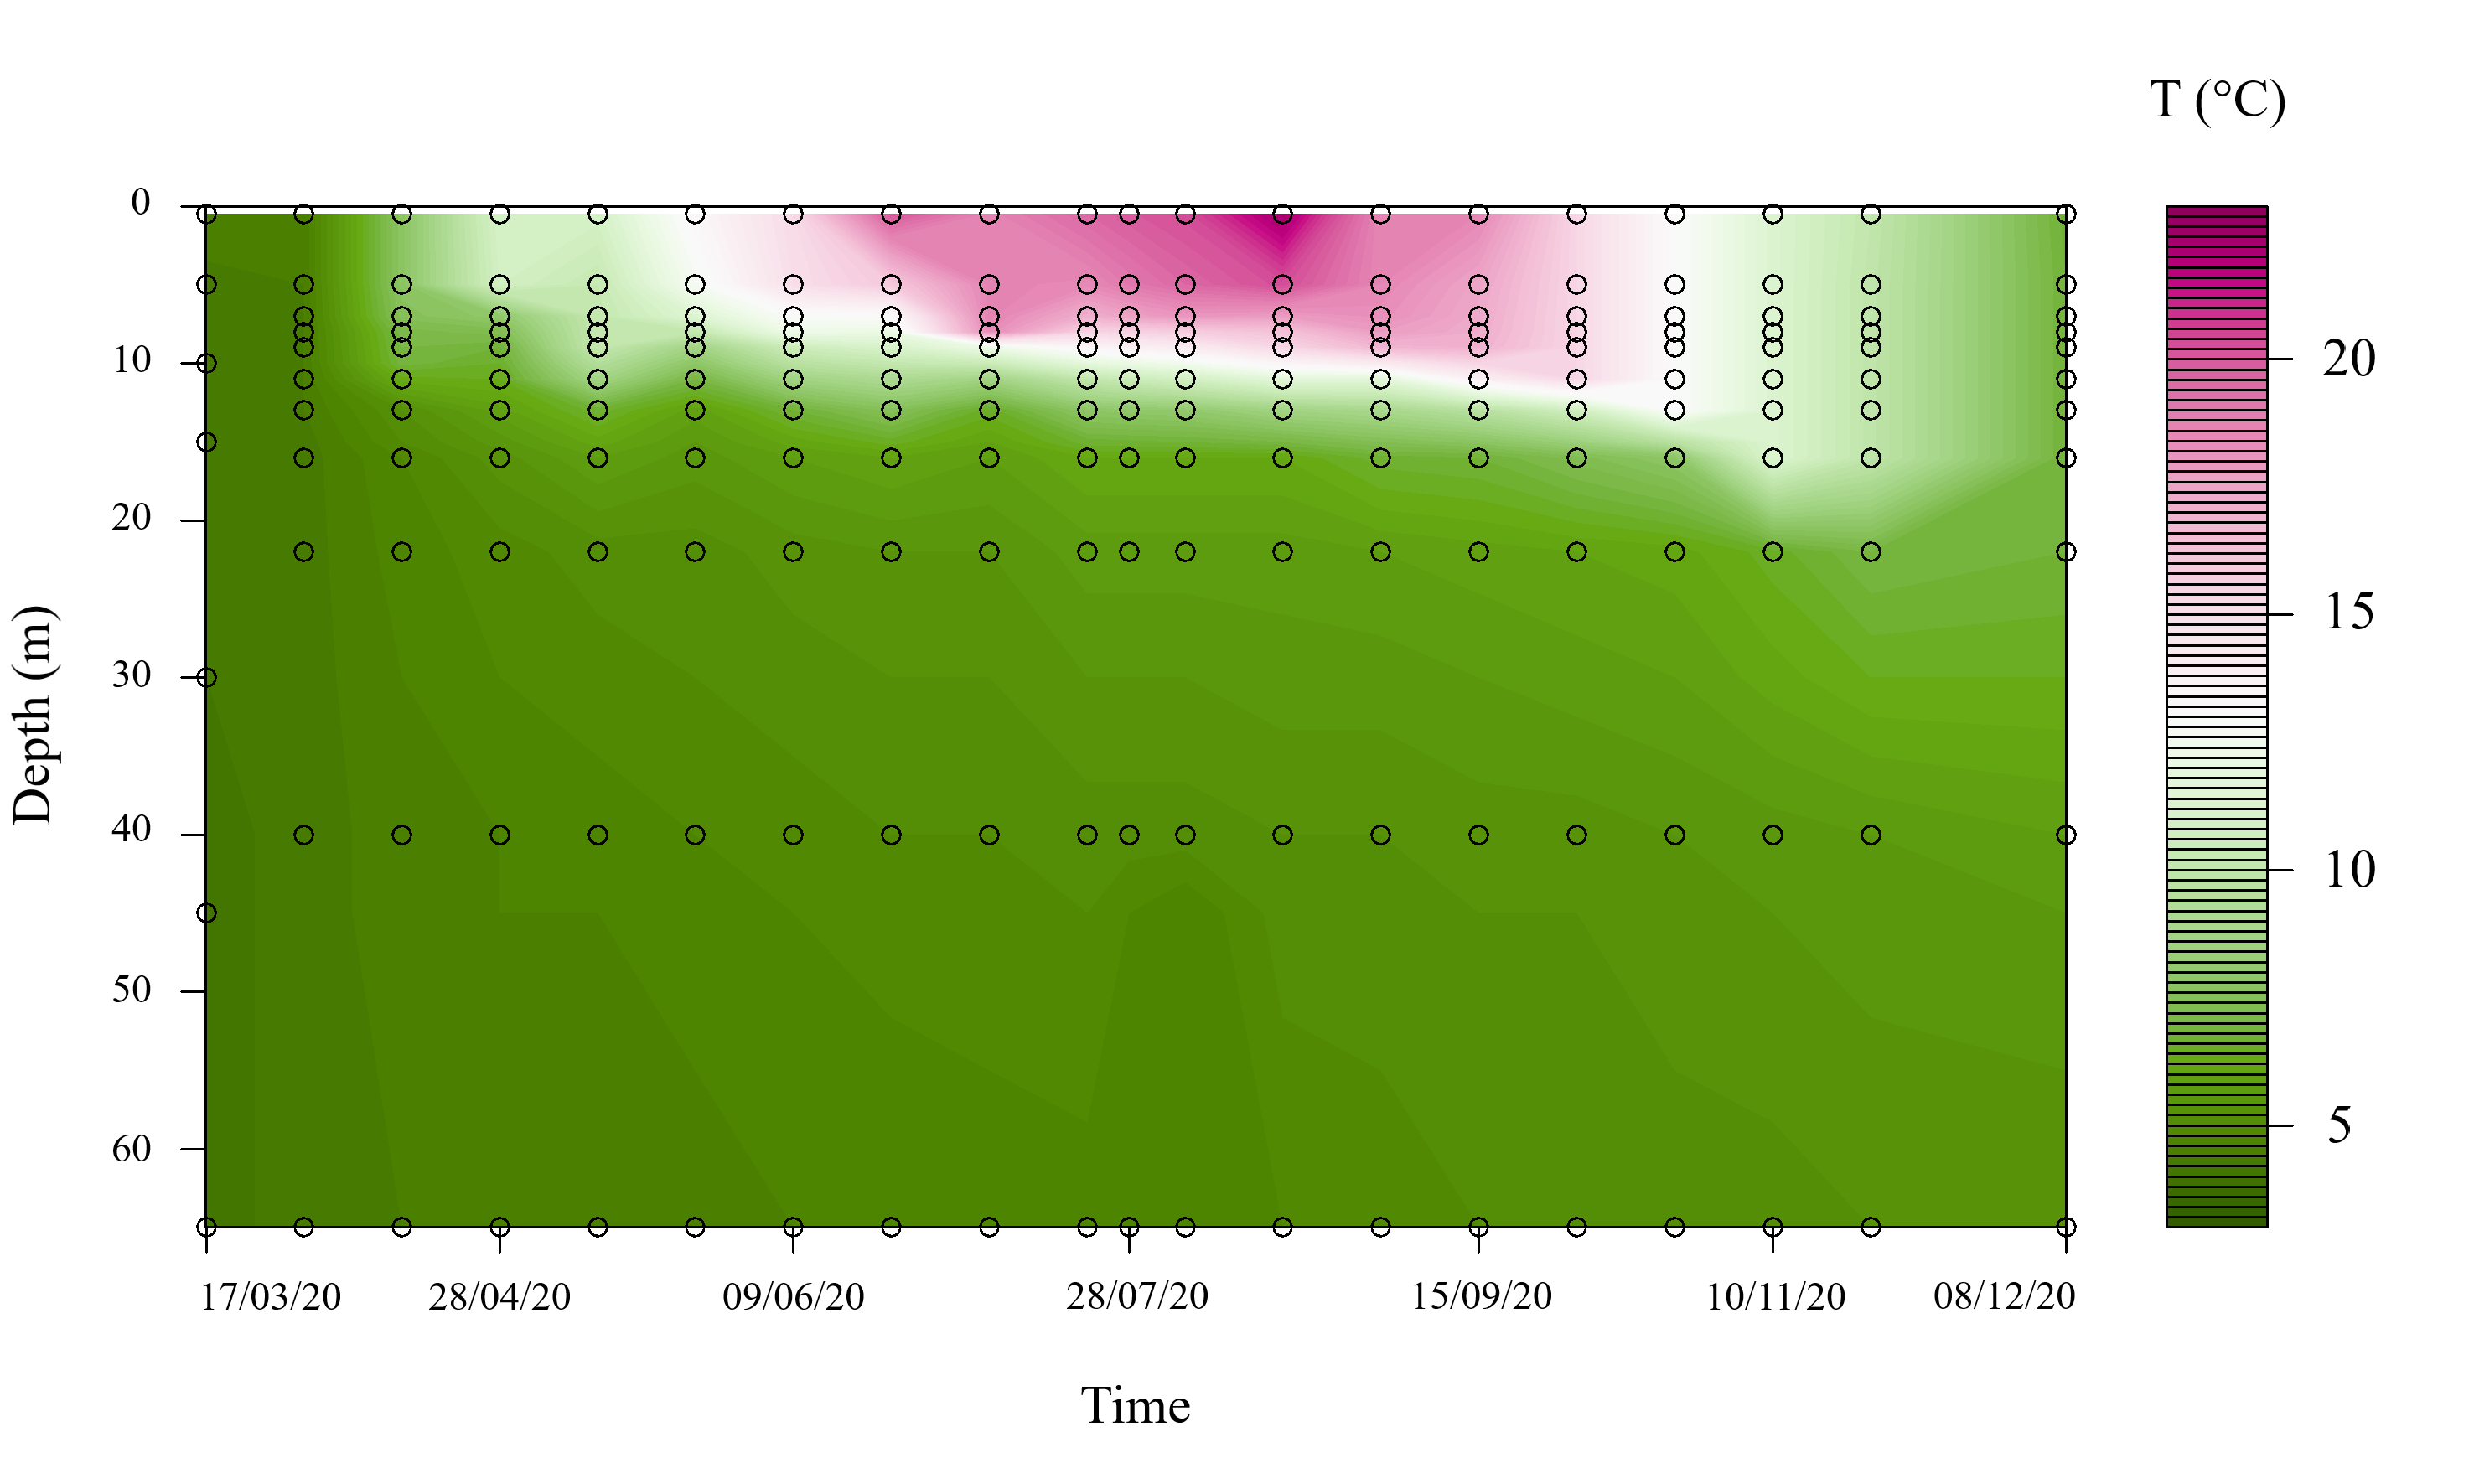


Figure S1 : Contour plot showing temperature variations during the observation period. Circles indicate sampling points from field campaigns.

Figure S2 : Correlation between DIC and its isotopes (δ13CDIC) in the epilimnion (yellow), metalimnion (pink), and hypolimnion (blue) of the Rappbode Reservoir.
