# Supplementary material for: Mineralization of autochthonous particulate organic carbon is a fast channel of organic matter turnover in Germany's largest drinking water reservoir
Source: Copernicus journal article supplement (doi:10.5194/bg-19-5343-2022), 2022-11-24
Supplement: Supplementary file 1 [file bg-19-5343-2022-supplement.zip › S2_R2.xlsx]

## Sheet: Data
SUPPLEMENTARY MATERIAL for
Mineralization of autochthonous particulate organic carbon is a fast channel of organic matter turnover in Germany’s largest drinking water reservoir
M. Dordoni, M. Seewald, K. Rinke, R. van Geldern, J. Schmidmeier, J.A.C. Barth
Date	Depth (m) (MOM)	Temp. [°C]	DIC [mmol L-1]	DOC [mmol L-1]	POC [mg L-1]	δ13C-DIC [‰]	δ13C-DOC [‰]	δ13C-auto-POC [‰]	DIC rate (mmol L-1 d-1)
2020-03-17	13	4.3	0.316	0.312	0.227	-7.7	-27.8	-30.2	/
2020-03-17	16	4.2	0.302	0.312	0.301	-7.9	-28	-30.6	/
2020-03-17	22	4.15	0.302	0.312	0.237	-7.9	-28	-29.4	/
2020-03-17	40	4.2	0.317	0.312	0.262	-7.9	-28	-30.4	/
2020-03-17	65	4.1	0.31	0.312	0.285	-7.9	-28.1	-30.9	/
2020-03-31	13	4.3547	0.316	0.307	0.24	-7.6	-28.2	-30.8	0
2020-03-31	16	4.34141	0.317	0.298	0.294	-7.7	-28.1	-30.2	0.00107143
2020-03-31	22	4.34234	0.317	0.293	0.244	-7.6	-28.1	-30.6	0.00107143
2020-03-31	40	4.33283	0.321	0.299	0.212	-7.6	-28	-30.2	0.000285714
2020-03-31	65	4.2937	0.287	0.28	0.261	-7.7	-28	-30.4
2020-04-14	13	9	0.311	0.284	0.323	-7.7	-28.1	-33.1
2020-04-14	16	9.1	0.319	0.295	0.229	-8	-28.1	-31.8	0.000607143
2020-04-14	22	9	0.339	0.311	0.171	-8.1	-28.2	-29.4	0.00132143
2020-04-14	40	8.3	0.339	0.297	0.15	-8	-28.2	-30.8	0.000785714
2020-04-14	65	9.4	0.351	0.315	0.212	-8.2	-28.1	-30.3
2020-04-28	13	5.9043	0.339	0.279	0.418	-7.7	-27.9	-32
2020-04-28	16	5.34846	0.333	0.288	0.231	-8.2	-28	-32.5	0.000738095
2020-04-28	22	4.9299	0.333	0.278	0.195	-8.4	-28	-32.2	0.000738095
2020-04-28	40	4.6106	0.32	0.266	0.194	-8.6	-28.1	-30.8	7.14286e-05
2020-04-28	65	4.4873	0.337	0.275	1.67	-8.7	-28	-30.4	0.000642857
2020-05-12	13	6.66926	0.33	0.29	0.351	-8.4	-28.1	-34.9	0.00025
2020-05-12	16	5.83348	0.31	0.29	0.54	-4.5	-28	-34.2	0.000321429
2020-05-12	22	5.09374	0.32	0.29	0.155	-8.7	-28.1	-31.5	0.000232143
2020-05-12	40	4.7186	0.33	0.32	0.159	-8.9	-28.1	-30
2020-05-12	65	4.50392	0.33	0.28	0.088	-9	-28	-30.5	0.000357143
2020-05-26	13	5.89192	0.341	0.3	0.48	-9.1	-28.5	-34	0.000357143
2020-05-26	16	5.46284	0.329	0.303	0.42	-9.1	-28.5	-32.4	0.000385714
2020-05-26	22	5.14536	0.328	0.274	0.2	-8.9	-28.3	-31	0.000371429
2020-05-26	40	4.7916	0.331	0.275	0.13	-8.9	-28.5	-30.6	0.0002
2020-05-26	65	4.5434	0.339	0.291	0.26	-8.9	-28.5	-29.9	0.000414286
2020-06-09	13	6.7719	0.36	0.26	0.774	-9.5	-28.2	-35.2	0.00052381
2020-06-09	16	5.7895	0.34	0.25	0.33	-10	-28.1	-33.3	0.000452381
2020-06-09	22	5.27663	0.34	0.28	0.263	-9.6	-28.3	-31.6	0.000452381
2020-06-09	40	4.90553	0.36	0.27	0.107	-9.5	-28.3	-28.1	0.000511905
2020-06-09	65	4.62254	0.34	0.26		-9.6	-28.2		0.000357143
2020-06-23	13	7.5426	0.38	0.27	1.05	-10.6	-28.5	-34.4	0.000653061
2020-06-23	16	5.98815	0.37	0.27	0.585	-10.8	-28.3	-33.2	0.000693878
2020-06-23	22	5.37888	0.36	0.28	0.277	-10.7	-28.2	-31.7	0.000591837
2020-06-23	40	4.965	0.3	0.28	0.128	-10.5	-28.4	-29.7	0.000438776
2020-06-23	65	4.6478	0.35	0.27		-10.6	-28.4		0.000408163
2020-07-07	13	6.5287	0.398	0.291	0.601	-11.7	-28	-31	0.000732143
2020-07-07	16	5.8282	0.378	0.29	0.419	-11.4	-28.1	-30.8	0.000678571
2020-07-07	22	5.4227	0.369	0.296	0.354	-10.9	-28	-28.3	0.000598214
2020-07-07	40	5.01279	0.363	0.295	0.161	-10.3	-27.9	-28.5	0.000410714
2020-07-07	65	4.677	0.367	0.286	0.157	-10.6	-28	-27.5	0.000508929
2020-07-21	13	7.76866	0.413	0.295	0.562	-12.3	-27.8	-31.4	0.000769841
2020-07-21	16	6.21158	0.395	0.297	0.458	-12	-28	-30.3	0.000738095
2020-07-21	22	5.6629	0.377	0.291		-11.5	-28		0.000598214
2020-07-21	40	5.13496	0.362	0.298		-10.7	-28		0.000357143
2020-07-21	65	4.71358	0.392	0.295		-11.4	-28.1		0.000650794
2020-07-28	13	15.9	0.436	0.268	0.93	-10.9	-28.3	-31.6
2020-07-28	16	15.2	0.4	0.281	0.48	-12.1	-27.9	-31	0.000736842
2020-07-28	22	14.7	0.39	0.269	0.22	-11.7	-27.8	-30.1	0.000661654
2020-07-28	40	14.4	0.379	0.288	0.11	-10.9	-28.3	-28.6	0.000466165
2020-07-28	65	14.1	0.389	0.268		-11.4	-28.2		0.000593985
2020-08-04	13	7.9806	0.427	0.293		-13.5	-28.3		0.000755102
2020-08-04	16	6.18249	0.395	0.278		-13.2	-28.3		0.000664286
2020-08-04	22	5.65416	0.582	0.268		-8.3	-28
2020-08-04	40	5.1306	0.354	0.302		-11.5	-28.2
2020-08-04	65	4.73612	0.389	0.296		-12.1	-28.2		0.000537415
2020-08-18	13	8.62983	0.488	0.282	0.283	-14.3	-28.4	-29.3	0.00106832
2020-08-18	16	6.2047	0.331	0.314	0.529	-4.4	-27.1	-23.3
2020-08-18	22	5.6965	0.388	0.29	0.123	-12.7	-28.2	-28.4
2020-08-18	40	5.1554	0.368	0.284	0.051	-12.1	-28.3	-27.9
2020-08-18	65	4.8131	0.395	0.295	0.108	-12.8	-28.2	-27	0.00052795
2020-09-01	13	8.93436	0.497	0.293		-14.9	-28.8		0.00103429
2020-09-01	16	6.7345	0.438	0.28	0.27	-14	-28.7	-25.6
2020-09-01	22	5.84369	0.401	0.293	0.139	-13.2	-28.7	-27.6
2020-09-01	40	5.228	0.385	0.282	0.073	-12.2	-28.7	-27
2020-09-01	65	4.90852	0.431	0.292	0.089	-13.4	-28.6	-27.3	0.000691429
2020-09-15	13	9.6329	0.525	0.276	0.533	-15.1	-27.6	-27.7	0.00110582
2020-09-15	16	6.8246	0.452	0.278	0.259	-14.8	-27.9	-27.3
2020-09-15	22	5.90867	0.406	0.282	0.185	-13.4	-28.1	-26.6
2020-09-15	40	5.28736	0.383	0.276		-12.9	-28
2020-09-15	65	4.97195	0.443	0.274		-14.2	-28		0.000703704
2020-09-29	13	10.7365	0.999	0.253	1.005	-5.3	-28.7	-26.8
2020-09-29	16	7.32608	0.937	0.231	0.257	-6.2	-28.7	-26.3
2020-09-29	22	5.98442	0.451	0.242	0.156	-11.9	-28	-26.6
2020-09-29	40	5.33309	0.393	0.233		-11.2	-28		0.000374384
2020-09-29	65	5.0367	0.412	0.224		-12.3	-28		0.000502463
2020-10-27	13	11.2903	0.505	0.298	1.047	-4.9	-27.3	-29.4	0.000497835
2020-10-27	16	11.2802	0.496	0.298	1.16	-4.7	-27.2	-29.2
2020-10-27	22	6.46301	0.417	0.232	0.362	-12.9	-27.8	-27.6
2020-10-27	40	5.54804	0.506	0.29	0.074	-12	-27.8	-27.5
2020-10-27	65	5.14554	0.574	0.287	0.058	-13	-27.8	-27.9
2020-11-10	13	9.92352	0.523	0.304	1.012	-5.9	-27.7	-30.1
2020-11-10	16	9.91793	0.53	0.307	1.054	-6.1	-27.8	-29.8
2020-11-10	22	7.01666	0.565	0.3	0.675	-12.5	-28.1	-28.5
2020-11-10	40	5.6341	0.443	0.241	0.268	-12.8	-28.1	-27.3	0.000514286
2020-11-10	65	5.1695	0.591	0.279	0.213	-13.5	-28.1	-26.8
2020-12-08	13	6.7713	0.47	0.299	0.401	-8.5	-27.8	-29.6
2020-12-08	16	6.7689	0.46	0.302	0.506	-8.5	-27.8	-29.5
2020-12-08	22	6.7624	0.44	0.293	0.374	-8.5	-27.8	-30.2
2020-12-08	40	5.81717	0.453	0.276		-12.9	-28.1		0.000525097
2020-12-08	65	5.2445	0.482	0.29		-13	-28.1
List of values of δ13C-alloPOC [‰] from personal communication
Date	δ13C-allo-POC [‰]
2020-09-09	-29.4048
2020-09-09	-31.3536
2020-09-09	-32.2684
2020-09-09	-31.0681
2020-09-09	-29.5272
2020-09-09	-30.7081
2020-09-09	-31.2588
2020-09-09	-31.7177
2020-09-09	-28.6869
2020-09-09	-31.0691
2020-09-09	-32.1617
2020-09-09	-32.1882
2020-09-09	-32.5385
2020-09-09	-30.3023
2020-09-09	-32.2525
2020-09-09	-30.2482
2020-09-09	-28.5777
2020-09-09	-29.028
